# Supplementary material
Source: Springer Nature journal article supplement (https://www.springermedizin.de/resource/supplementary/13023_2014_750_MOESM9_ESM.pdf/9642974)
Supplement: MOESM9 [file 9642974]

**A**

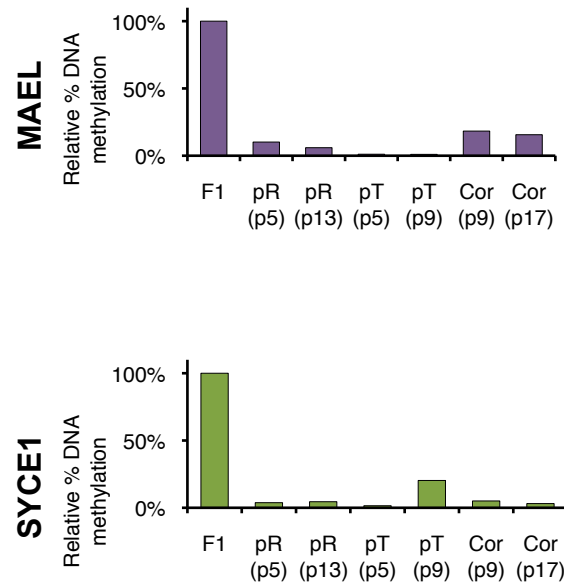

**B**

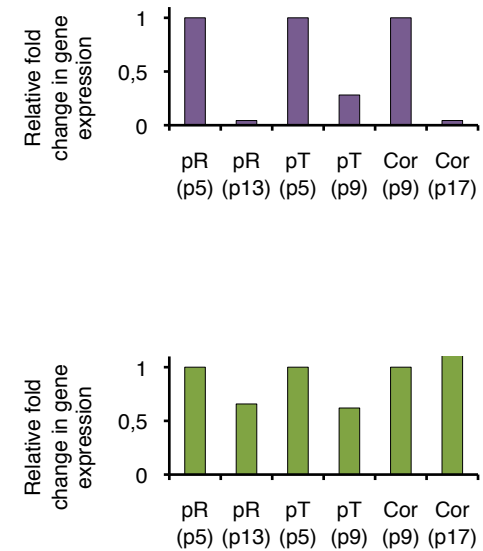

**Additional File 9. Relative DNA methylation and expression analysis of MAEL and SYCE1 in primary fibroblasts derived from ICF patients at different passages in culture.** (A) DNA methylation and (B) expression analysis were performed as in legend of Figure 1 and Figure 2. The number of passages are indicated into brackets.
